# Supplementary material
Source: HighWire-hosted journal article supplement (https://emj.bmj.com/content/38/4/270)
Supplement: inline-supplementary-material-1 [file inline-supplementary-material-1.pdf]

**Appendix 1.** Hospitals that participated in the CRASH-3 trial sub-study.

| <b>CRASH-3 Trial Principal Investigator</b> | <b>Hospital</b>                             | <b>Number of patients recruited into CRASH-3 trial</b> | <b>Number of CRASH-3 trial patients in this study</b> |
|---------------------------------------------|---------------------------------------------|--------------------------------------------------------|-------------------------------------------------------|
| Professor Tim Harris                        | Royal London Hospital (London, UK)          | 501                                                    | 314 (63%)                                             |
| Dr Sabariah Faizah Jamaluddin               | Hospital Sungai Buloh (Malaysia)            | 410                                                    | 276 (67%)                                             |
| Professor Antonio Belli                     | Queen Elizabeth Hospital (Birmingham, UK)   | 302                                                    | 267 (88%)                                             |
| Dr Fatahul Mohamed                          | Hospital Sultanah Bahiyah (Malaysia)        | 241                                                    | 151 (63%)                                             |
| Dr Caroline Leech                           | University Hospital Coventry (Coventry, UK) | 312                                                    | 133 (43%)                                             |
| Dr Mohd Lotfi Hamzah                        | Hospital Sultanah Nur Zahirah (Malaysia)    | 205                                                    | 130 (63%)                                             |
| Dr Phil Moss                                | St George's Hospital (London, UK)           | 280                                                    | 105 (38%)                                             |
| Professor Fiona Lecky                       | Salford Royal Hospital (Salford, UK)        | 176                                                    | 72 (41%)                                              |
| Dr Phillip Hopkins                          | King's College Hospital (London, UK)        | 155                                                    | 64 (41%)                                              |
| Dr Darin Wong                               | Penang General Hospital (Malaysia)          | 161                                                    | 64 (40%)                                              |
| Dr Jason Kendall                            | Southmead Hospital (North Bristol, UK)      | 156                                                    | 59 (38%)                                              |
| Dr Adrian Boyle                             | Addenbrooke's Hospital (Cambridge, UK)      | 103                                                    | 58 (56%)                                              |
| Professor Mark Wilson                       | St Mary's Hospital (London, UK)             | 117                                                    | 42 (36%)                                              |
| Dr Melanie Darwent                          | John Radcliffe Hospital (Oxford, UK)        | 76                                                     | 32 (42%)                                              |
|                                             | <i>Total</i>                                | <i>3,195</i>                                           | <i>1,767</i>                                          |

Note: 3143 patients were recruited into the CRASH-3 trial in the UK (59 hospitals) and 1567 patients in Malaysia (17 hospitals).
