# Supplementary material
Source: HighWire-hosted journal article supplement (https://emj.bmj.com/content/38/4/270)
Supplement: inline-supplementary-material-2 [file inline-supplementary-material-2.pdf]

**Appendix 2.** Pre-randomisation and post-randomisation CT scan forms (paper version adapted into web version for data collection).

**CRASH-3: CT Scan Sub-Study – ISRCTN 15088122**

**PRE-RANDOMISATION CT SCAN FORM**

|                                                                                        |        |  |  |  |                                                                                                              |  |
|----------------------------------------------------------------------------------------|--------|--|--|--|--------------------------------------------------------------------------------------------------------------|--|
| <b>CRASH-3 SUB-STUDY: PRE-RANDOMISATION CT SCAN FORM</b>                               |        |  |  |  | 1. a. <input type="checkbox"/> first reader                                                                  |  |
| <i>Complete as requested and circle where appropriate, please do not leave blanks.</i> |        |  |  |  | b. <input type="checkbox"/> second reader                                                                    |  |
| 2.                                                                                     | a.Box  |  |  |  | 3. Has this patient been scanned before randomisation? YES / NO<br>Time between injury and scan (hrs): _____ |  |
|                                                                                        | b.Pack |  |  |  |                                                                                                              |  |

**4. Haemorrhagic findings**

|                                                                                              |  |       |    |                                                        |              |                                                     |      |                                                                                                                                                                                                                                                                                                                                                                                                               |   |    |
|----------------------------------------------------------------------------------------------|--|-------|----|--------------------------------------------------------|--------------|-----------------------------------------------------|------|---------------------------------------------------------------------------------------------------------------------------------------------------------------------------------------------------------------------------------------------------------------------------------------------------------------------------------------------------------------------------------------------------------------|---|----|
| a. Is there any intracranial bleeding on CT scan?<br><i>(circle one option on each line)</i> |  |       |    | YES                                                    | NO           | <i>If NO, go to Question 5<br/>If YES, continue</i> |      |                                                                                                                                                                                                                                                                                                                                                                                                               |   |    |
| <b>Please specify type and volume of haemorrhage:</b>                                        |  |       |    |                                                        |              |                                                     |      |                                                                                                                                                                                                                                                                                                                                                                                                               |   |    |
| b. Parenchymal                                                                               |  | YES   | NO |                                                        |              |                                                     |      | Codes<br>L: Left<br>R: Right<br><br>T: Temporal<br>F: Frontal<br>P: Parietal<br>O: Occipital<br><br>BG: Basal Ganglia<br>B: Brainstem<br><br><b>Abbreviations</b><br>A: maximal diameter (mm);<br>B: maximal diameter perpendicular to A (mm);<br>C: number of slices on which haemorrhage is visible multiplied by slice thickness (mm);<br>HU: Hounsfield Unit<br><br>F: Focal<br>M: Multiple<br>D: Diffuse |   |    |
| bii. Code                                                                                    |  | A     | B  | C                                                      | (ABC/2)/1000 | HU*                                                 | Note |                                                                                                                                                                                                                                                                                                                                                                                                               |   |    |
|                                                                                              |  |       |    |                                                        |              |                                                     |      |                                                                                                                                                                                                                                                                                                                                                                                                               |   |    |
| c. Subdural                                                                                  |  | YES   | NO | <i>(measure width only**)</i>                          |              |                                                     |      |                                                                                                                                                                                                                                                                                                                                                                                                               |   |    |
| cii. Code                                                                                    |  |       | B  |                                                        |              | HU                                                  | Note |                                                                                                                                                                                                                                                                                                                                                                                                               |   |    |
|                                                                                              |  |       |    |                                                        |              |                                                     |      |                                                                                                                                                                                                                                                                                                                                                                                                               |   |    |
| d. Epidural                                                                                  |  | YES   | NO |                                                        |              |                                                     |      |                                                                                                                                                                                                                                                                                                                                                                                                               |   |    |
| dii. code                                                                                    |  | A     | B  | C                                                      | (ABC/2)/1000 | HU                                                  | Note |                                                                                                                                                                                                                                                                                                                                                                                                               |   |    |
|                                                                                              |  |       |    |                                                        |              |                                                     |      |                                                                                                                                                                                                                                                                                                                                                                                                               |   |    |
| e. Intraventricular                                                                          |  | YES   | NO |                                                        |              |                                                     |      |                                                                                                                                                                                                                                                                                                                                                                                                               |   |    |
| eii. code                                                                                    |  | A     | B  | C                                                      | (ABC/2)/1000 | HU                                                  | Note |                                                                                                                                                                                                                                                                                                                                                                                                               |   |    |
|                                                                                              |  |       |    |                                                        |              |                                                     |      |                                                                                                                                                                                                                                                                                                                                                                                                               |   |    |
| f. Petechial                                                                                 |  | YES   | NO | Note:                                                  |              |                                                     |      |                                                                                                                                                                                                                                                                                                                                                                                                               |   |    |
| g. Subarachnoid                                                                              |  | YES   | NO | <i>(tick one option per line for each haemorrhage)</i> |              |                                                     |      |                                                                                                                                                                                                                                                                                                                                                                                                               |   |    |
| gii. code                                                                                    |  | Small |    |                                                        | Medium       |                                                     |      | Large                                                                                                                                                                                                                                                                                                                                                                                                         |   | HU |
|                                                                                              |  | F     | M  | D                                                      | F            | M                                                   | D    | F                                                                                                                                                                                                                                                                                                                                                                                                             | M |    |
|                                                                                              |  |       |    |                                                        |              |                                                     |      |                                                                                                                                                                                                                                                                                                                                                                                                               |   |    |
|                                                                                              |  |       |    |                                                        |              |                                                     |      |                                                                                                                                                                                                                                                                                                                                                                                                               |   |    |

## CRASH-3: CT Scan sub-study – ISRCTN 15088122

## 5. CT characteristics

| Marshall Classification (circle YES to the most severe option only)                                         |     |    |
|-------------------------------------------------------------------------------------------------------------|-----|----|
| a. Diffuse injury I (no visible pathology)                                                                  | YES | NO |
| b. Diffuse injury II (cisterns present with midline shift 0-5mm; no lesion >25cm <sup>3</sup> )             | YES | NO |
| c. Diffuse injury III (cisterns compressed/absent with midline shift 0-5mm; no lesion > 25cm <sup>3</sup> ) | YES | NO |
| d. Diffuse injury IV (midline shift > 5mm; no lesion > 25cm <sup>3</sup> )                                  | YES | NO |
| e. Evacuated mass lesion (any lesion surgically evacuated)                                                  | YES | NO |
| f. Non-evacuated mass lesion (lesion >25cm <sup>3</sup> ; not surgically evacuated)                         | YES | NO |

## 6. Non-haemorrhagic findings (circle one option on each line)

|                                                       |     |    |                        |           |           |           |                            |
|-------------------------------------------------------|-----|----|------------------------|-----------|-----------|-----------|----------------------------|
| a. Is there any sign of acute focal ischaemic lesion? | YES | NO | Volume:                | A: ___ mm | B: ___ mm | C: ___ mm | ABC/2: ___ cm <sup>3</sup> |
| b. Are there any oedematous lesions?                  | YES | NO | bi. total volume in ml |           |           |           |                            |

## 7. Mass effect findings (circle one option on each line)

|                                                                              |     |    |                            |  |  |  |  |
|------------------------------------------------------------------------------|-----|----|----------------------------|--|--|--|--|
| Please specify if any of the following <i>mass effect</i> signs are present: |     |    |                            |  |  |  |  |
| a. Sulcal effacement                                                         | YES | NO |                            |  |  |  |  |
| b. Ventricular effacement                                                    | YES | NO |                            |  |  |  |  |
| c. Midline shift                                                             | YES | NO | ci. approximate shift (mm) |  |  |  |  |
| If yes to any of the above, is the mass effect caused by:                    |     |    |                            |  |  |  |  |
| d. Haemorrhage                                                               | YES | NO |                            |  |  |  |  |
| e. Oedema                                                                    | YES | NO |                            |  |  |  |  |
| f. Both                                                                      | YES | NO |                            |  |  |  |  |

## 8. Neurosurgery

|                                          |     |    |                     |                    |                             |
|------------------------------------------|-----|----|---------------------|--------------------|-----------------------------|
| a. Did the patient undergo neurosurgery? | YES | NO | b. Type of surgery: | c. Date of surgery | ___/___/___<br>(dd/mm/yyyy) |
|                                          |     |    | _____               |                    |                             |
|                                          |     |    | _____               |                    |                             |

## 9. Details of reading

|                                           |       |                    |                             |
|-------------------------------------------|-------|--------------------|-----------------------------|
| a. Name of the person completing the form | _____ | b. Date of reading | ___/___/___<br>(dd/mm/yyyy) |
|-------------------------------------------|-------|--------------------|-----------------------------|

|                                                                   |          |
|-------------------------------------------------------------------|----------|
| Has this patient been scanned after randomisation into the trial? | YES / NO |
| Any relevant patient notes                                        | _____    |

\* Place cursor on most visually dense portion of lesion

\*\* If the width of a subdural bleed is greater than 6mm, we can assume the volume is 27cm<sup>3</sup> (i.e. to aid rating the Marshall Classification)

## CRASH-3: CT Scan sub-study – ISRCTN 15088122

## POST-RANDOMISATION CT SCAN FORM

|                                                                                 |                 |                                                     |
|---------------------------------------------------------------------------------|-----------------|-----------------------------------------------------|
| <b>CRASH-3 SUB-STUDY: POST-RANDOMISATION CT SCAN FORM</b>                       |                 | 1. a. <input type="checkbox"/> first reader         |
| Complete as requested and circle where appropriate, please do not leave blanks. |                 | b. <input type="checkbox"/> second reader           |
| 2.                                                                              | a.Box<br>b.Pack | 3. Time between randomisation and scan (hrs): _____ |
| Are the follow-up CT scan parameters comparable with the initial CT scan?       |                 | YES NO                                              |

## 4. Haemorrhagic findings

|                                                                                       |       |     |                                                 |                                             |     |       |   |    |   |   |
|---------------------------------------------------------------------------------------|-------|-----|-------------------------------------------------|---------------------------------------------|-----|-------|---|----|---|---|
| a. Is there any intracranial bleeding on CT scan?<br>(circle one option on each line) |       | YES | NO                                              | If NO, go to Question 5<br>If YES, continue |     |       |   |    |   |   |
| Please specify type and volume of haemorrhage:                                        |       |     |                                                 |                                             |     |       |   |    |   |   |
| b. Parenchymal                                                                        | YES   | NO  |                                                 |                                             |     |       |   |    |   |   |
| bii. Code                                                                             | A     | B   | C                                               | (ABC/2)/1000                                | HU* | Note  |   |    |   |   |
|                                                                                       |       |     |                                                 |                                             |     |       |   |    |   |   |
|                                                                                       |       |     |                                                 |                                             |     |       |   |    |   |   |
| c. Subdural                                                                           | YES   | NO  | (measure width only**)                          |                                             |     |       |   |    |   |   |
| cii. Code                                                                             |       | B   |                                                 |                                             | HU  | Note  |   |    |   |   |
|                                                                                       |       |     |                                                 |                                             |     |       |   |    |   |   |
|                                                                                       |       |     |                                                 |                                             |     |       |   |    |   |   |
| d. Epidural                                                                           | YES   | NO  |                                                 |                                             |     |       |   |    |   |   |
| dii. code                                                                             | A     | B   | C                                               | (ABC/2)/1000                                | HU  | Note  |   |    |   |   |
|                                                                                       |       |     |                                                 |                                             |     |       |   |    |   |   |
|                                                                                       |       |     |                                                 |                                             |     |       |   |    |   |   |
| e. Intraventricular                                                                   | YES   | NO  |                                                 |                                             |     |       |   |    |   |   |
| eii. code                                                                             | A     | B   | C                                               | (ABC/2)/1000                                | HU  | Note  |   |    |   |   |
|                                                                                       |       |     |                                                 |                                             |     |       |   |    |   |   |
|                                                                                       |       |     |                                                 |                                             |     |       |   |    |   |   |
| f. Petechial                                                                          | YES   | NO  | Note:                                           |                                             |     |       |   |    |   |   |
| g. Subarachnoid                                                                       | YES   | NO  | (tick one option per line for each haemorrhage) |                                             |     |       |   |    |   |   |
| gii. code                                                                             | Small |     | Medium                                          |                                             |     | Large |   | HU |   |   |
|                                                                                       | F     | M   | D                                               | F                                           | M   | D     | F |    | M | D |
|                                                                                       |       |     |                                                 |                                             |     |       |   |    |   |   |
|                                                                                       |       |     |                                                 |                                             |     |       |   |    |   |   |
| h. Is this a new haemorrhage (not seen on pre-randomisation scan)?                    |       |     |                                                 |                                             | YES | NO    |   |    |   |   |
| hi. Give details (e.g. subdural present on pre-randomisation but not follow up):      |       |     |                                                 |                                             |     |       |   |    |   |   |

Codes  
L: Left  
R: Right  
T: Temporal  
F: Frontal  
P: Parietal  
O: Occipital  
BG: Basal Ganglia  
B: Brainstem  
Abbreviations  
A: maximal diameter (mm);  
B: maximal diameter perpendicular to A (mm);  
C: number of slices on which haemorrhage is visible multiplied by slice thickness (mm);  
HU: Hounsfield Unit  
F: Focal  
M: Multiple  
D: Diffuse

## CRASH-3: CT Scan sub-study – ISRCTN 15088122

## 5. CT characteristics

| Marshall Classification (circle YES to the most severe option only)                                         |     |    |
|-------------------------------------------------------------------------------------------------------------|-----|----|
| a. Diffuse injury I (no visible pathology)                                                                  | YES | NO |
| b. Diffuse injury II (cisterns present with midline shift 0-5mm; no lesion >25cm <sup>3</sup> )             | YES | NO |
| c. Diffuse injury III (cisterns compressed/absent with midline shift 0-5mm; no lesion > 25cm <sup>3</sup> ) | YES | NO |
| d. Diffuse injury IV (midline shift > 5mm; no lesion > 25cm <sup>3</sup> )                                  | YES | NO |
| e. Evacuated mass lesion (any lesion surgically evacuated)                                                  | YES | NO |
| f. Non-evacuated mass lesion (lesion >25cm <sup>3</sup> ; not surgically evacuated)                         | YES | NO |

## 6. Non-haemorrhagic findings (circle one option on each line)

|                                                                                          |     |    |                        |           |           |           |                            |
|------------------------------------------------------------------------------------------|-----|----|------------------------|-----------|-----------|-----------|----------------------------|
| a. Is there any sign of acute focal ischaemic lesion?                                    | YES | NO | Volume:                | A: ___ mm | B: ___ mm | C: ___ mm | ABC/2: ___ cm <sup>3</sup> |
| ai. Is this a new acute focal ischaemic lesion (not seen on the pre-randomisation scan)? | YES | NO |                        |           |           |           |                            |
| b. Are there any oedematous lesions?                                                     | YES | NO | bi. total volume in ml |           |           |           |                            |

## 7. Mass effect findings (circle one option on each line)

| Please specify if any of the following <b>mass effect</b> signs are present: |     |    |                             |
|------------------------------------------------------------------------------|-----|----|-----------------------------|
| a. Sulcal effacement                                                         | YES | NO |                             |
| b. Ventricular effacement                                                    | YES | NO |                             |
| c. Midline shift                                                             | YES | NO | ci. approximate shift in mm |
| If yes to any of the above, is the mass effect caused by:                    |     |    |                             |
| d. Haemorrhage                                                               | YES | NO |                             |
| e. Oedema                                                                    | YES | NO |                             |
| f. Both                                                                      | YES | NO |                             |

## 8. Neurosurgery

|                                          |     |    |                     |                                             |
|------------------------------------------|-----|----|---------------------|---------------------------------------------|
| a. Did the patient undergo neurosurgery? | YES | NO | b. Type of surgery: | c. Hours between surgery and CT scan: _____ |
|                                          |     |    |                     |                                             |

## 9. Details of reading

|                                           |       |                    |                                |
|-------------------------------------------|-------|--------------------|--------------------------------|
| a. Name of the person completing the form | _____ | c. Date of reading | ____/____/____<br>(dd/mm/yyyy) |
|-------------------------------------------|-------|--------------------|--------------------------------|

## 10. Ischaemic lesions on further post-randomisation scans

|                                                                                           |     |    |
|-------------------------------------------------------------------------------------------|-----|----|
| ai. Is there a second post-randomisation scan?                                            | YES | NO |
| aii. If there is a second post-randomisation scan, is there a new focal ischaemic lesion? | YES | NO |
| bi. Is there a third post-randomisation scan?                                             | YES | NO |
| bii. If there is a third post-randomisation scan, is there a new focal ischaemic lesion?  | YES | NO |

|                                                              |       |
|--------------------------------------------------------------|-------|
| Any relevant patient notes (including info on further scans) | _____ |
|--------------------------------------------------------------|-------|
